# Supplementary material
Source: Springer Nature journal article supplement (https://www.springermedizin.de/resource/supplementary/12885_2013_4450_MOESM2_ESM.pdf/9466408)

## Additional file 2 - Supplementary figure 1

### Histograms for STAT1 expression in tumor and stroma

Number of cases with different scores for proportion of stained tumor or stroma cells (0, none; 1, <10%; 2, 10-50%; 3, >50%) as well as the intensity of staining (0, none; 1, weak; 2, moderate; 3, strong) are shown. Scoring was performed for specific expression in nucleus and cytoplasm. A highly similar scoring was obtained by evaluation of only nuclear expression as indicated by the Spearman's correlation coefficients and their two-tailed significances of the two scoring procedures for tumor cells ( $r = 0.983$ ,  $p < 0.00001$ ) and the stroma ( $r = 0.823$ ,  $p < 0.00001$ ).

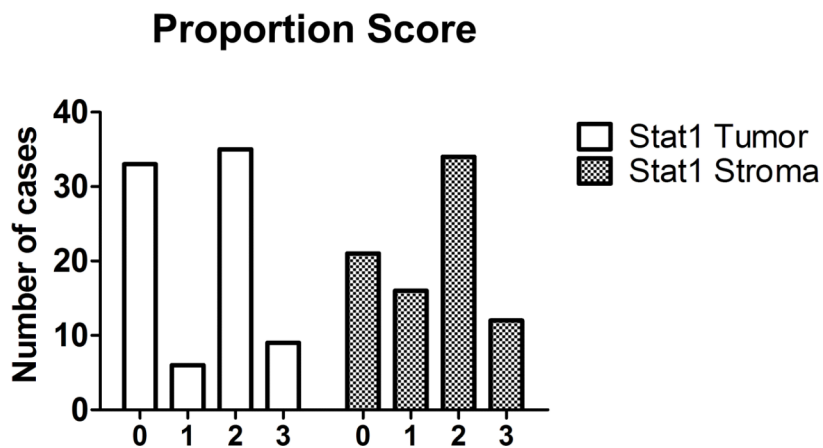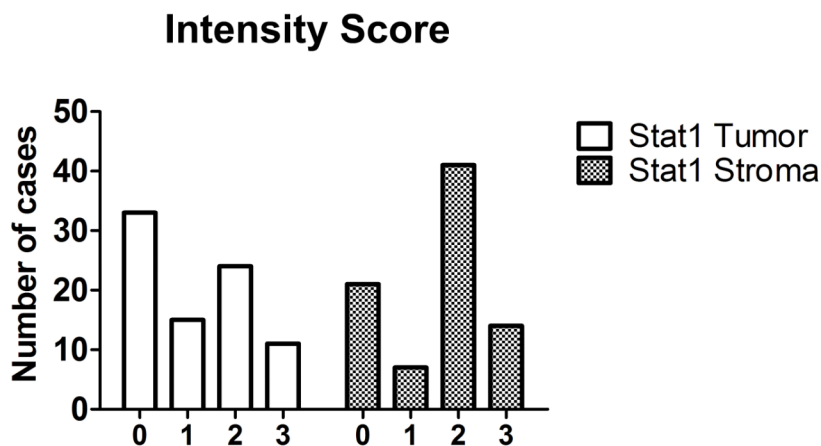

Supplement: MOESM2 [file 9466408]
